# Supplementary material for: Long-term Evaluation of Allogeneic Bone Marrow-derived Mesenchymal Stromal Cell Therapy for Crohn’s Disease Perianal Fistulas
Source: PubMed Central journal article supplement (PMC6930001; doi:10.1093/ecco-jcc/jjz116), 2019-06-14

# Supplementary Figure 1

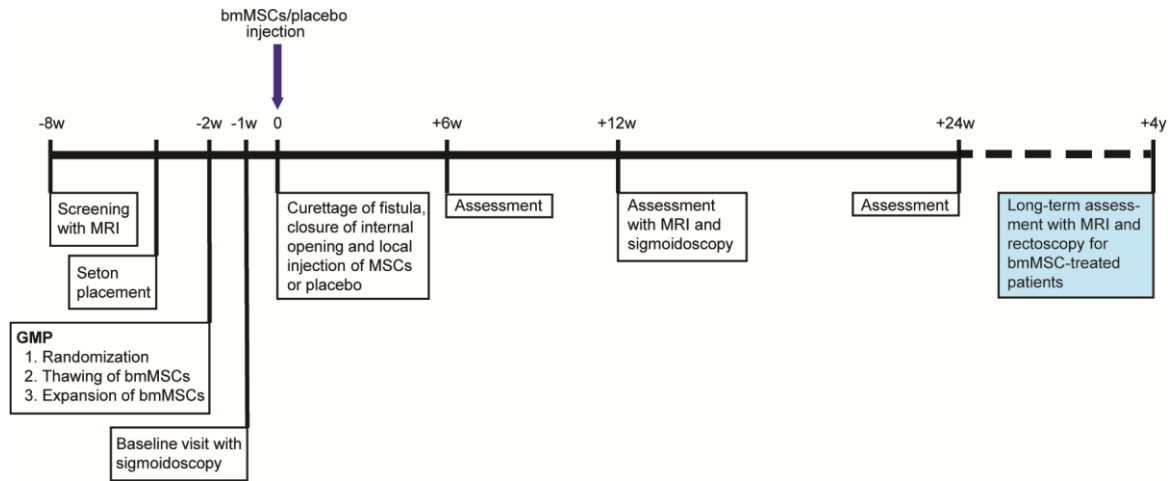

Supplementary Figure 2

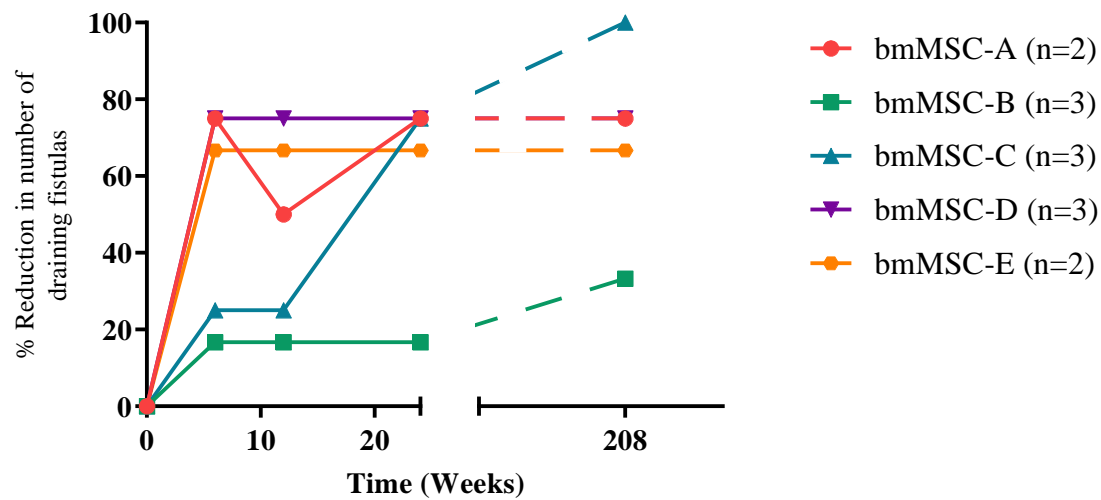

Supplement: jjz116_suppl_supplemantery_figures.pdf [file jjz116_suppl_supplemantery_figures.pdf]
